# Supplementary material for: Effects of SPI1-mediated transcriptome remodeling on Alzheimer’s disease-related phenotypes in mouse models of Aβ amyloidosis
Source: PubMed Central journal article supplement (PMC11088624; doi:10.1038/s41467-024-48484-x), 2024-05-11
Supplement: 41467_2024_48484_MOESM1_ESM.pdf [file 41467_2024_48484_MOESM1_ESM.pdf]

# Supplementary Figure 1

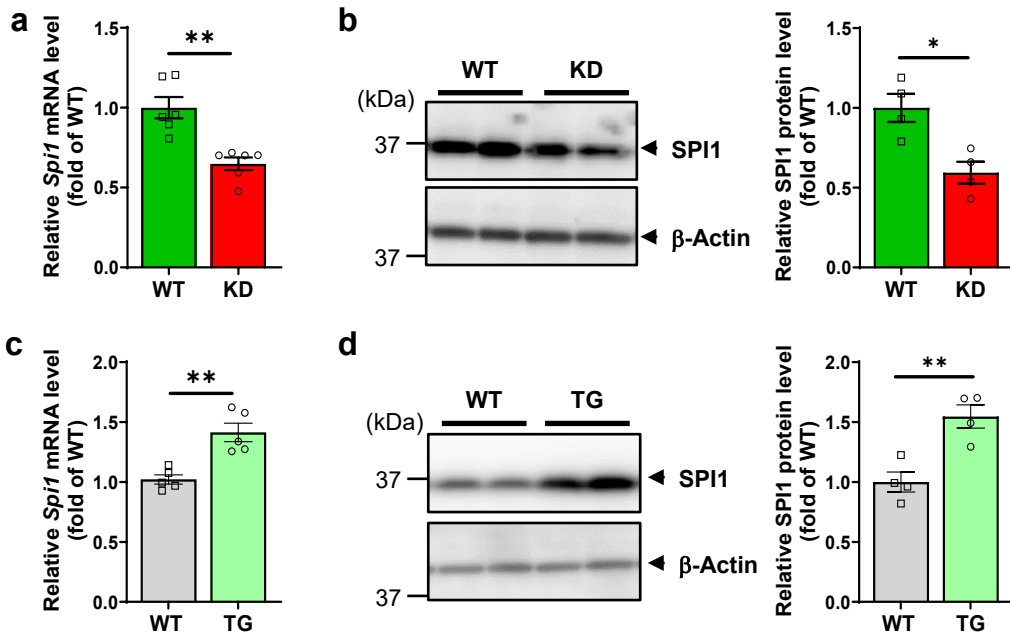

**Supplementary Fig. 1 | *Spi1* expression levels in *Spi1* mutant mice compared to each littermate-control.** **a**, The qPCR analysis of *Spi1* mRNA level in the cortex of two-month-old male *Spi1*-wildtype (WT) and *Spi1*-knockdown (KD) mice. All values are mean  $\pm$  SEM. \*\* $p < 0.01$  (unpaired, two-tailed  $t$ -test;  $n = 6$  per group). **b**, The WB analysis of SPI1 protein levels in cortex of two-month-old male WT and KD mice.  $\beta$ -actin was used as the loading control. All values are mean  $\pm$  SEM. \* $p < 0.05$  (unpaired, two-tailed  $t$ -test;  $n = 4$  per group). **c**, The qPCR analysis of *Spi1* mRNA level in the cortex of two-month-old male *Spi1* WT and *Spi1*-transgenic (TG) mice. All values are mean  $\pm$  SEM. \*\* $p < 0.01$  (unpaired, two-tailed  $t$ -test;  $n = 5$  per group). **d**, The WB analysis of SPI1 protein levels in cortex of two-month-old male WT and TG mice.  $\beta$ -actin was used as the loading control. All values are mean  $\pm$  SEM. \*\* $p < 0.01$  (unpaired, two-tailed  $t$ -test;  $n = 4$  per group). Source data are provided as a Source data file.

## Supplementary Figure 2

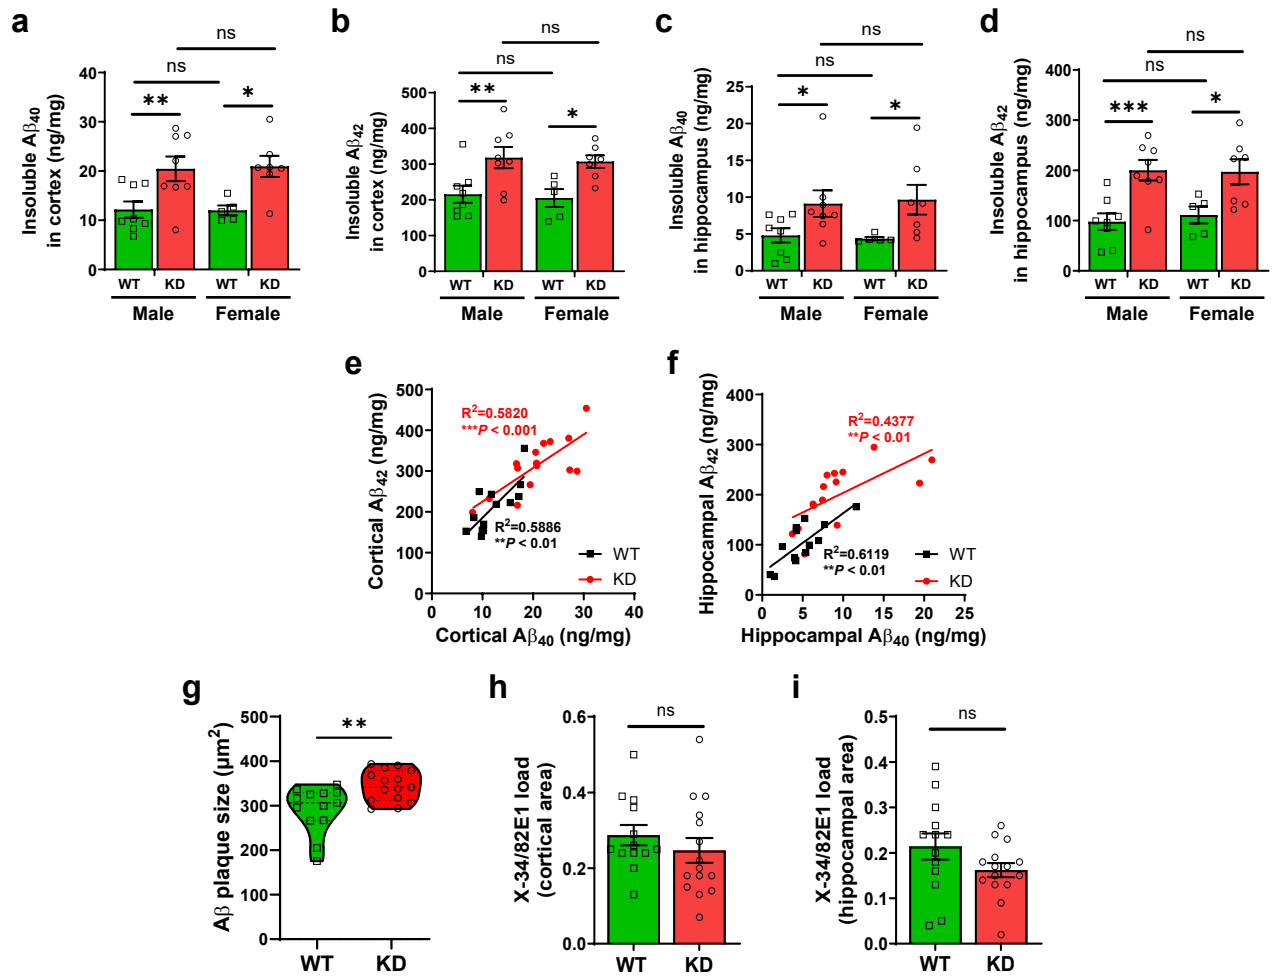

**Supplementary Fig. 2 | Reducing *Spi1* expression has no differential sex effect on A $\beta_{40}$  and A $\beta_{42}$  levels in the cortex and hippocampus of APP/PS1 mice. a-d,** The MSD A $\beta$  ELISA analysis of A $\beta_{40}$  (a,c) and A $\beta_{42}$  (b,d) levels from the guanidine fraction of the cortex (a-b) and hippocampus (c-d) of *Spi1*<sup>+/+</sup>;APP/PS1 mice and *Spi1*<sup>+/-</sup>;APP/PS1 mice. All values are mean  $\pm$  SEM. \**p*<0.05, \*\**p*<0.01, and \*\*\**p*<0.001 (two-way ANOVA with *Fischer's* LSD multiple comparisons test; WT, *n* = 8 for male, *n* = 5 for female; KD, *n* = 8 for male, *n* = 7 for female; ns, not significant). **e-f,** Correlation between the insoluble A $\beta_{40}$  and A $\beta_{42}$  levels in the cortex (e) and hippocampus (f) of *Spi1*<sup>+/+</sup>;APP/PS1 mice and *Spi1*<sup>+/-</sup>;APP/PS1 mice. \*\**p*<0.01 and \*\*\**p*<0.001 (*Pearson's* correlation coefficients analysis; WT, *n* = 13 for *Spi1*<sup>+/+</sup>;APP/PS1; KD, *n* = 15 for *Spi1*<sup>+/-</sup>;APP/PS1). **g,** Quantitation of the size of A $\beta$  plaques in the cortex of *Spi1*<sup>+/+</sup>;APP/PS1 mice and *Spi1*<sup>+/-</sup>;APP/PS1 mice. \*\**p*<0.01 (unpaired, two-tailed *t*-test; WT, *n* = 13 for *Spi1*<sup>+/+</sup>;APP/PS1; KD, *n* = 15 for *Spi1*<sup>+/-</sup>;APP/PS1). **h,i,** The ratio of fibrillar plaque to total plaque load in the cortex (h) and hippocampus (i) of *Spi1*<sup>+/+</sup>;APP/PS1 mice and *Spi1*<sup>+/-</sup>;APP/PS1 mice. All values are mean  $\pm$  SEM. (unpaired, two-tailed *t*-test; WT, *n* = 13 for *Spi1*<sup>+/+</sup>;APP/PS1; KD, *n* = 15 for *Spi1*<sup>+/-</sup>;APP/PS1; ns, not significant). Source data are provided as a Source data file.

## Supplementary Figure 3

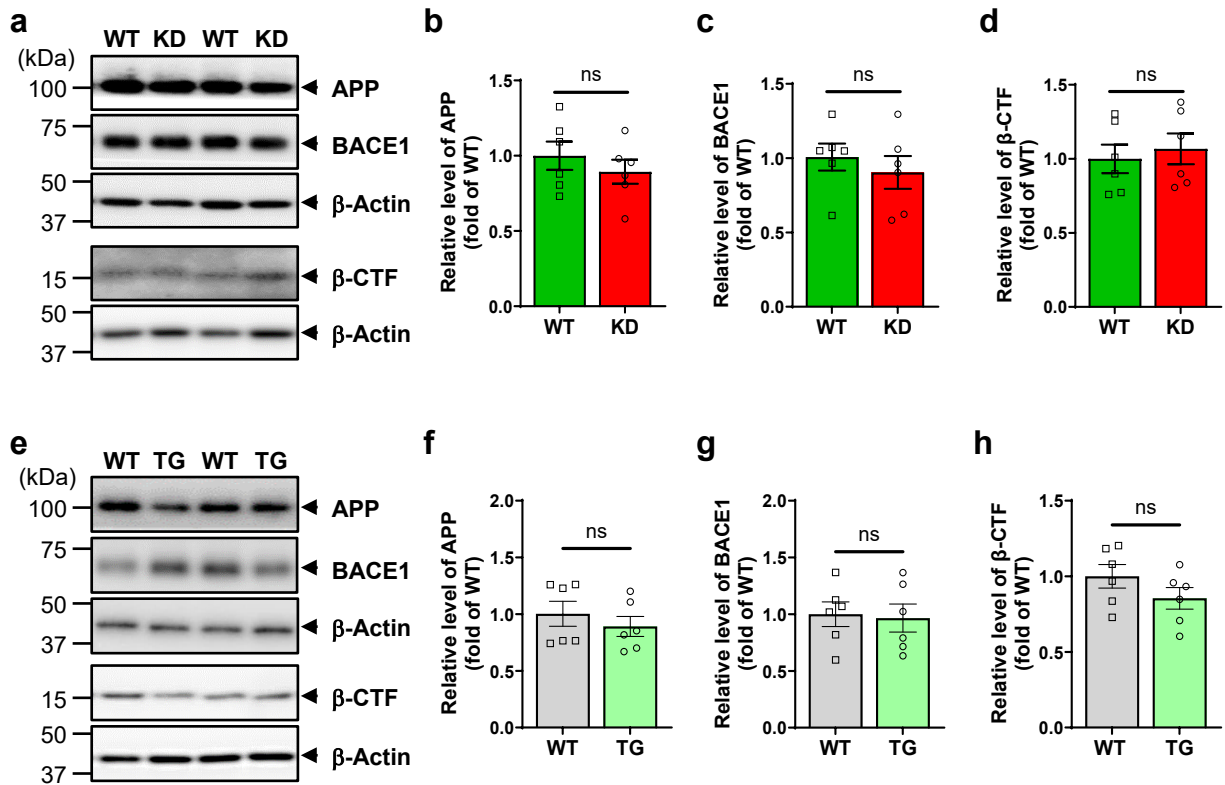

**Supplementary Fig. 3 | Knockdown of *Spi1* does not affect full-length APP and BACE1 protein levels.** **a-d**, Western blot analyses of APP, BACE1, and  $\beta$ -CTF in the cortex of *Spi1*<sup>+/+</sup>;APP/PS1 (WT) mice and *Spi1*<sup>+/-</sup>;APP/PS1(KD) mice. **a**, Representative images of western blots. Quantification of the relative protein levels of APP (**b**), BACE1 (**c**), and  $\beta$ -CTF (**d**) immunoblots. Data were normalized by  $\beta$ -actin levels and expressed as fold-change relative to WT. All values are mean  $\pm$  SEM. (unpaired, two-tailed *t*-test; *n* = 6 for each group; *ns*, not significant).

**Overexpression of *Spi1* does not affect full-length APP and BACE1 protein levels.** **e-h**, Western blot analyses of APP, BACE1, and  $\beta$ -CTF in the cortex of *Spi1*<sup>+/+</sup>;5XFAD (WT) and *Spi1*<sup>Tg/0</sup>;5XFAD (TG) mice. **e**, Representative images of western blots. Quantification of the relative protein levels of APP (**f**), BACE1 (**g**), and  $\beta$ -CTF (**h**) immunoblots. Data were normalized by  $\beta$ -Actin levels and expressed as fold-change relative to WT. All values are mean  $\pm$  SEM. (unpaired, two-tailed *t*-test; *n* = 6 for each group; *ns*, not significant). Source data are provided as a Source data file.

## Supplementary Figure 4

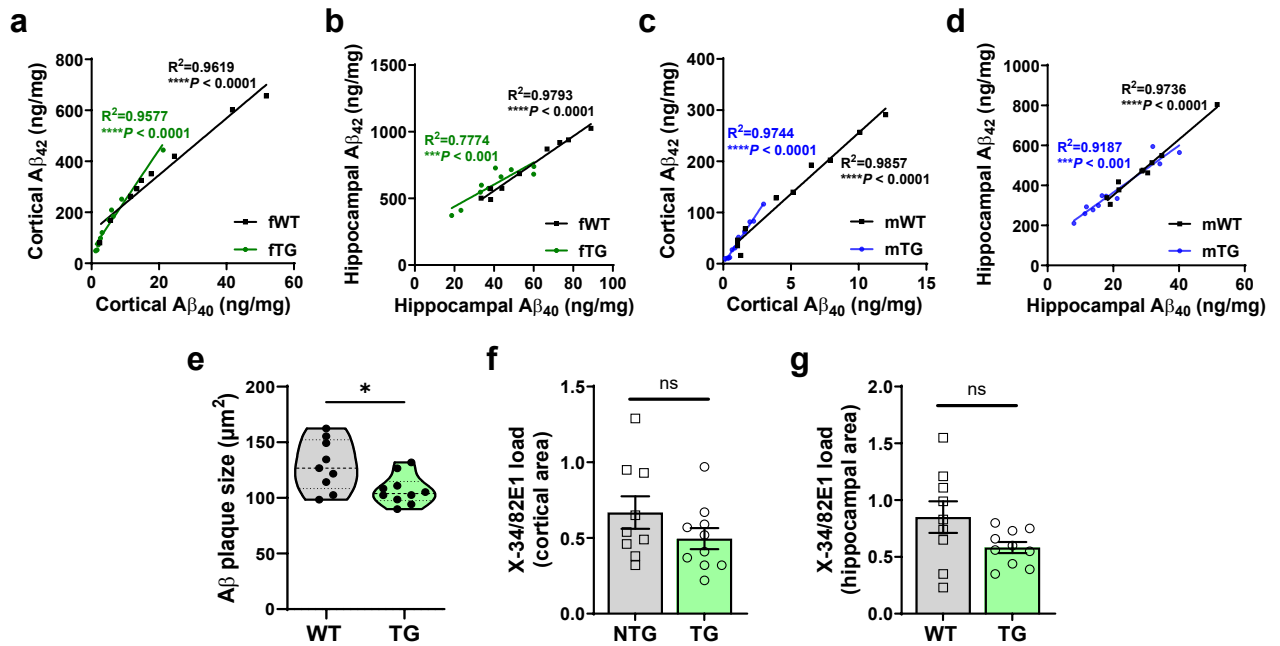

**Supplementary Fig. 4 | Insoluble A $\beta_{40}$  and A $\beta_{42}$  levels have a strong correlation in the cortex and hippocampus of 5XFAD mice.** **a-b**, Correlation of the insoluble A $\beta_{40}$  and A $\beta_{42}$  levels in the cortex (**a**) and hippocampus (**b**) of female *Spi1*<sup>+/+</sup>;5XFAD (fWT) and *Spi1*<sup>Tg/0</sup>;5XFAD (fTG) mice.  $***p < 0.001$  and  $****p < 0.0001$  (Pearson's correlation coefficients analysis; fWT,  $n = 9$  for *Spi1*<sup>+/+</sup>;5XFAD; fTG,  $n = 10$  for *Spi1*<sup>Tg/0</sup>;5XFAD). **c-d**, Correlation of the insoluble A $\beta_{40}$  and A $\beta_{42}$  levels in the cortex (**c**) and hippocampus (**d**) of male *Spi1*<sup>+/+</sup>;5XFAD (mWT) and *Spi1*<sup>Tg/0</sup>;5XFAD (mTG) mice.  $***p < 0.001$  and  $****p < 0.0001$  (Pearson's correlation coefficients analysis; mWT,  $n = 10$  for *Spi1*<sup>+/+</sup>;5XFAD; mTG,  $n = 11$  for *Spi1*<sup>Tg/0</sup>;5XFAD). **e**, Quantitation of the size of A $\beta$  plaques in the cortex of *Spi1*<sup>+/+</sup>;5XFAD and *Spi1*<sup>Tg/0</sup>;5XFAD mice.  $*p < 0.05$  (unpaired, two-tailed *t*-test; WT,  $n = 9$  for *Spi1*<sup>+/+</sup>;5XFAD; TG,  $n = 10$  for *Spi1*<sup>Tg/0</sup>;5XFAD). **f,g**, The ratio of fibrillar plaque to total plaque load in the cortex (**f**) and hippocampus (**g**) of *Spi1*<sup>+/+</sup>;5XFAD mice and *Spi1*<sup>Tg/0</sup>;5XFAD mice. All values are mean  $\pm$  SEM. (unpaired, two-tailed *t*-test; WT,  $n = 9$  for *Spi1*<sup>+/+</sup>;5XFAD; TG,  $n = 10$  for *Spi1*<sup>Tg/0</sup>;5XFAD; ns, not significant). Source data are provided as a Source data file.

## Supplementary Figure 5

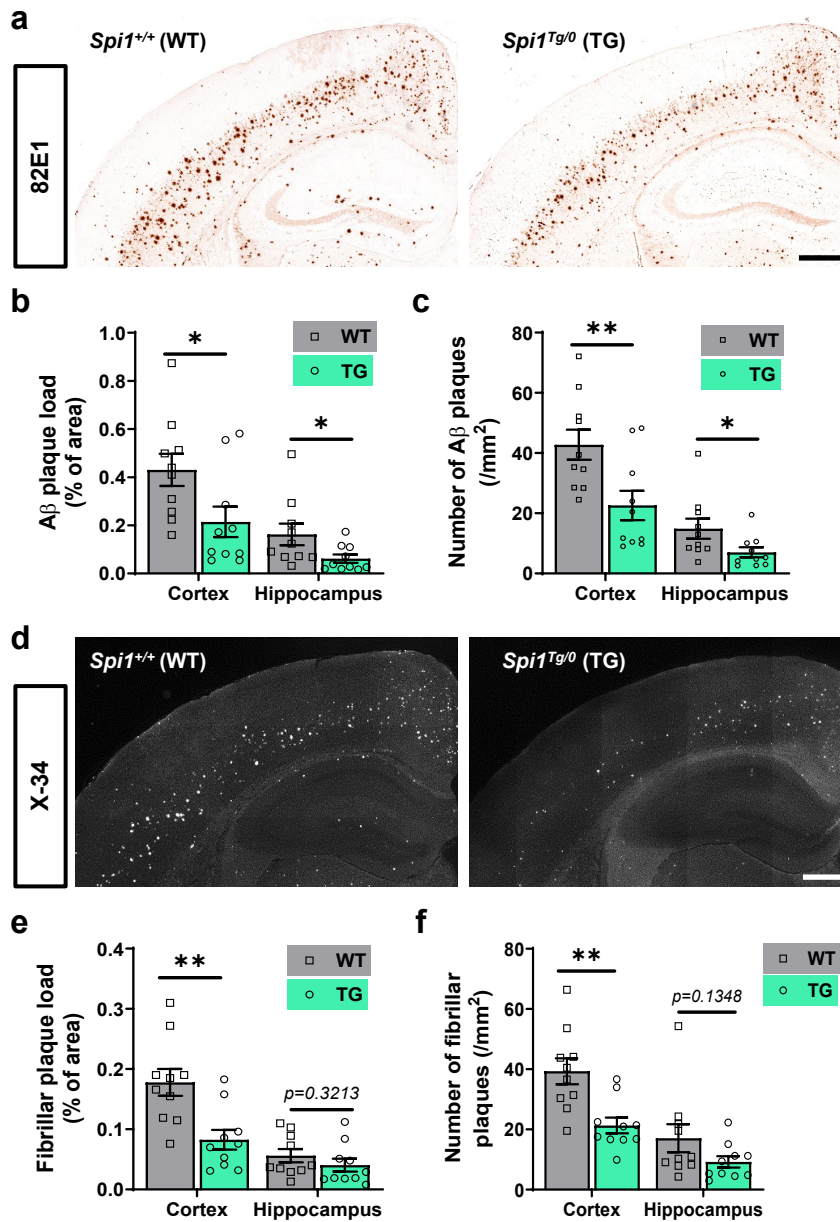

**Supplementary Fig. 5 | *Spi1*-overexpression decreases 82E1-positive Aβ plaques and X-34-positive fibrillar plaques in the brains of male 5XFAD mice.** **a**, Representative images of 82E1-positive plaques in brain slices from male *Spi1*<sup>+/+</sup>;5XFAD and *Spi1*<sup>Tg/0</sup>;5XFAD mice. Scale bars, 500 μm. **b-c**, Quantification of the Aβ plaque deposition (**b**) and the total number of Aβ plaques (**c**) in the cortical and hippocampal areas. All values are mean ± SEM. \**p*<0.05 and \*\**p*<0.01 (unpaired, two-tailed *t*-test; WT, *n* = 10 for *Spi1*<sup>+/+</sup>;5XFAD; TG, *n* = 10 for *Spi1*<sup>Tg/0</sup>;5XFAD). **d**, Representative images of X-34-positive fibrillar plaque in brain slices from male *Spi1*<sup>+/+</sup>;5XFAD and *Spi1*<sup>Tg/0</sup>;5XFAD mice. Scale bars, 500 μm. **e-f**, Quantification of the fibrillar plaque deposition (**e**), and the total number of fibrillar plaques (**f**) in the cortical and hippocampal areas. All values are mean ± SEM. \*\**p*<0.01 (unpaired, two-tailed *t*-test; WT, *n* = 10 for *Spi1*<sup>+/+</sup>;5XFAD; TG, *n* = 10 for *Spi1*<sup>Tg/0</sup>;5XFAD). Source data are provided as a Source data file.

## Supplementary Figure 6

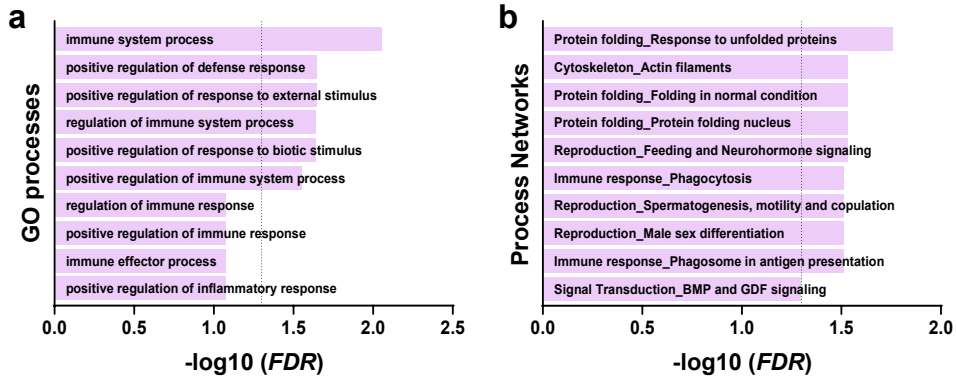

**Supplementary Fig. 6 | Integrative analysis of DEG in *Sp11*-knockdown and -overexpression mouse models. a-b, GO process enrichment analysis (a) and Process Networks enrichment analysis (b) with the functional annotation of DEGs from knockdown and overexpression data were performed using the MetaCore software. *P*-values of a,b were calculated using Metacore algorithms with threshold of significant enrichment as adjusted  $p < 0.05$  (shown as a vertical dash line for a,b). Source data are provided as Supplementary information.**

## Supplementary Figure 7

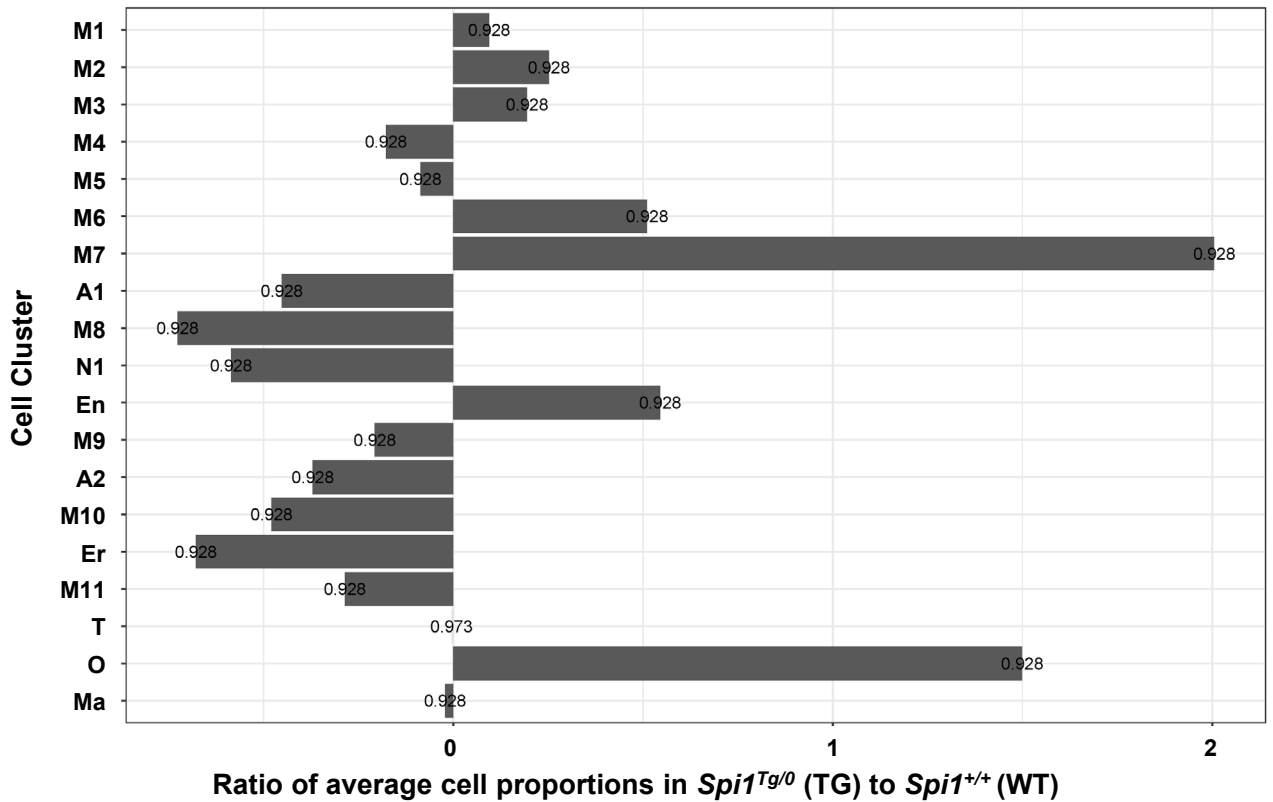

**Supplementary Fig. 7 | Ratio of average cell proportions per cluster per genotype.** Shown are bar plots per each cell cluster (M1-11=microglia; A1-2=astrocytes; En=endothelial cells; Er=erythrocytes; Ma=macrophages; N1=neurons; O=oligodendrocytes; and T=T-cells) representing the ratio of average cell proportions between the genotypes (Cells in *Spi1<sup>Tg/0</sup>*;5XFAD mice/Cells in *Spi1<sup>+/+</sup>*;5XFAD mice). *Benjamini-Hochberg*-adjusted *p*-values are shown at the end of each bar. Source data are provided as a Source data file.

# Supplementary Figure 8

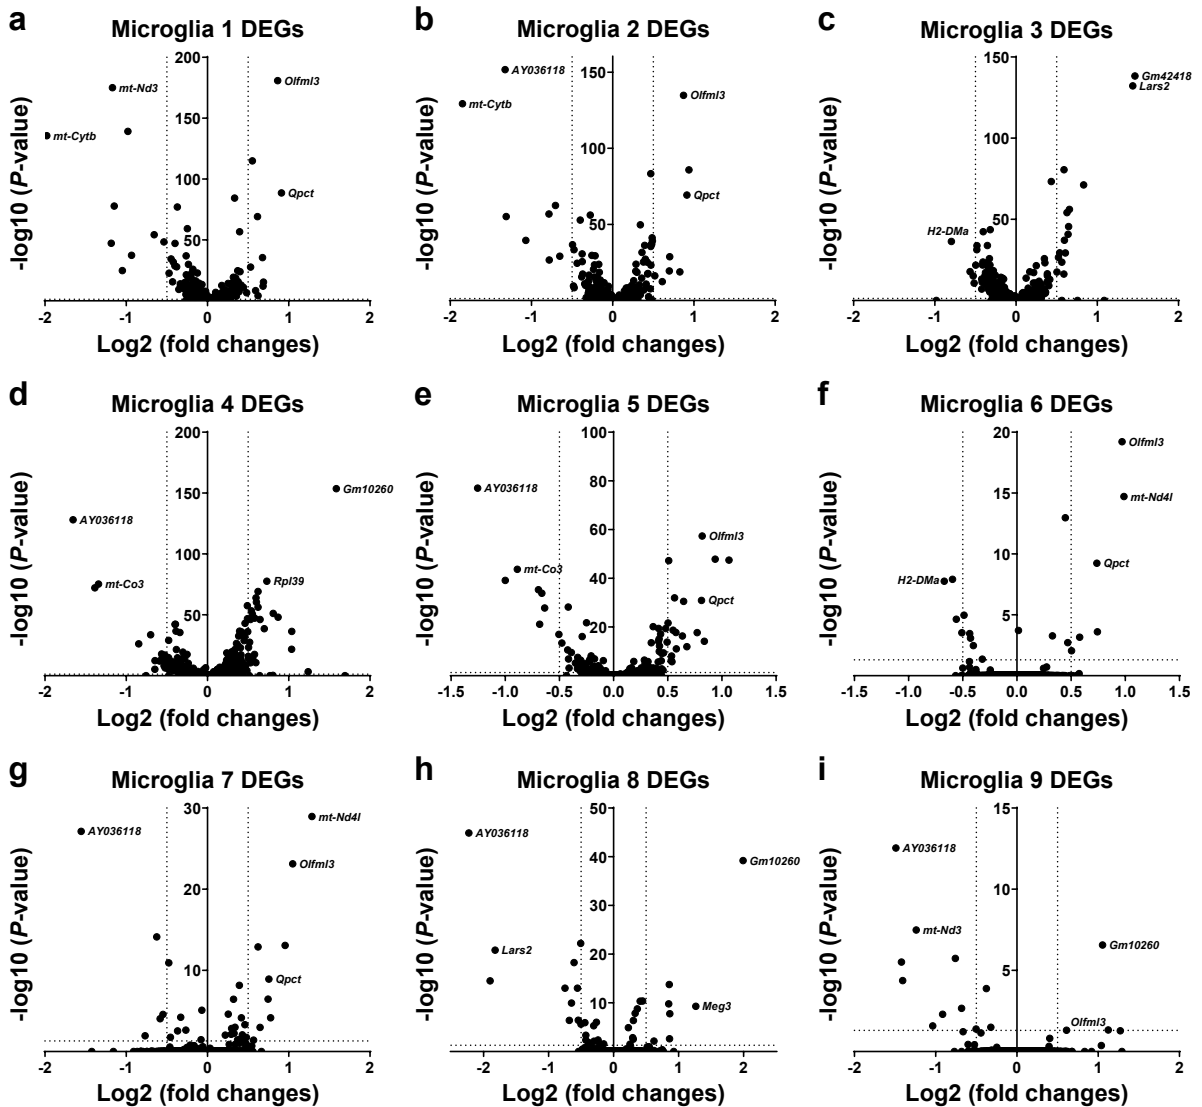

**Supplementary Fig. 8 | scRNA-seq identified DEGs in microglia clusters in *Spi1<sup>+/+</sup>;5XFAD* and *Spi1<sup>Tg/0</sup>;5XFAD* mice. a-i, Volcano plot showing DEGs in microglia clusters 1-9. The dashed lines on the volcano plots represent significance as the *Benjamini-Hochberg*-adjusted  $-\log_{10} p$ -value, where adjusted  $p < 0.05$  (y-axis) and a  $\log_2$  fold change of 0.585 (x-axis). Source data are provided as Supplementary information.**





# Supplementary Figure 10

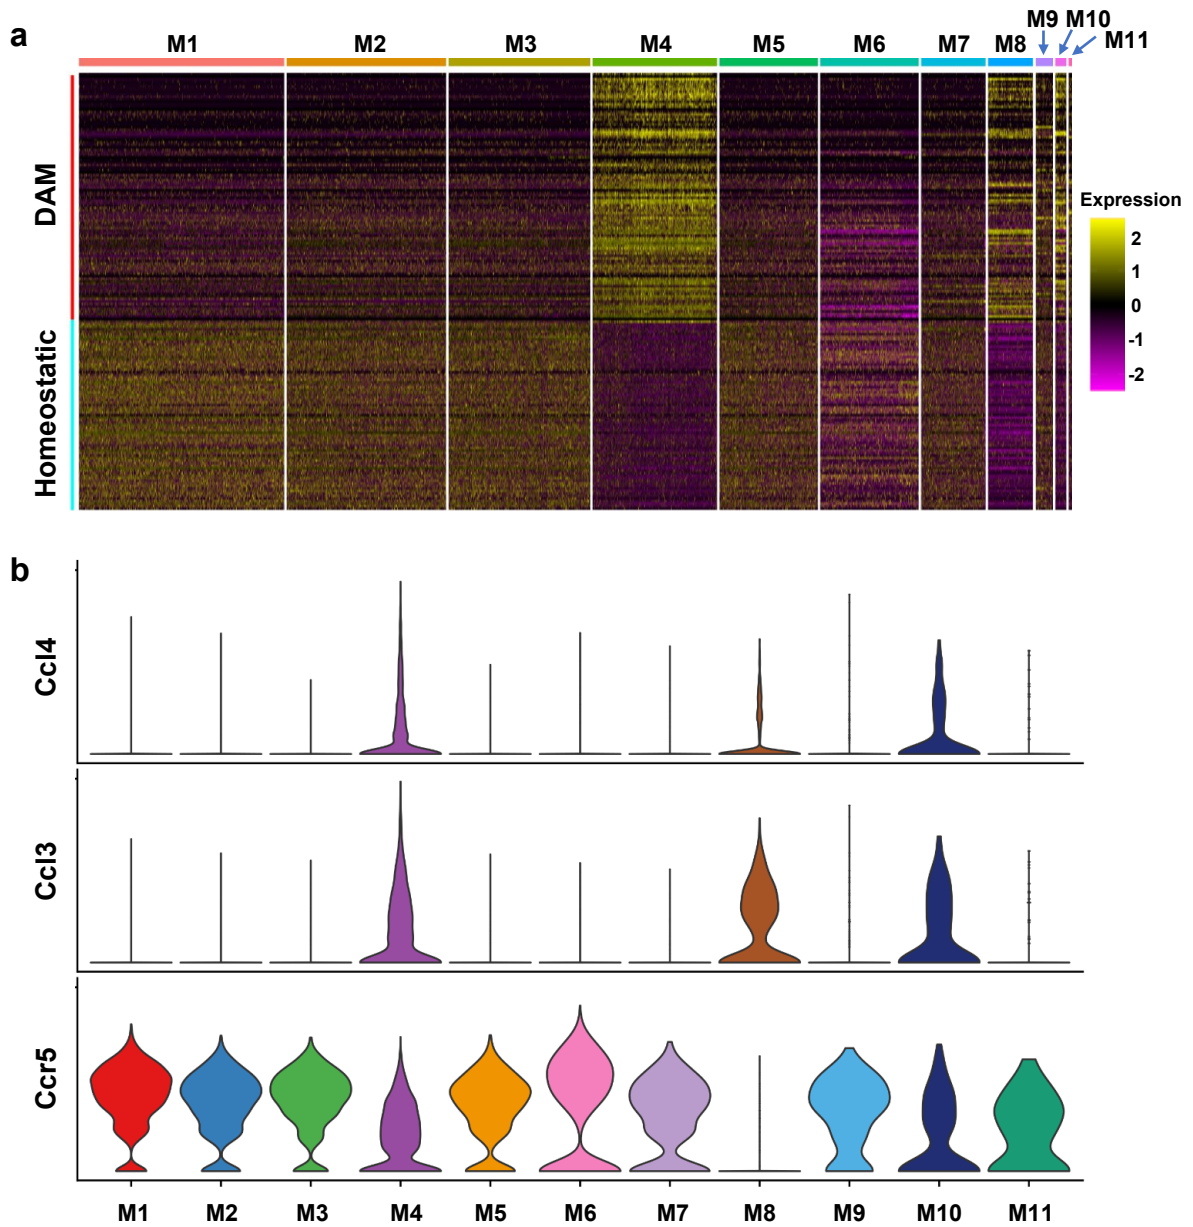

**Supplementary Fig. 10 | Expression of DAM and Homeostatic genes in microglia clusters and their communication.** **a**, Heatmaps showing expression of DAM and homeostatic genes identified by Keren-Shaul *et al.*, 2017 across microglia clusters 1-11. Expression is shown as standard deviations above (yellow) or below (purple) the scaled mean of expression of all genes for each cell. **b**, Violin plots show the expression of CCL receptor (*Ccr5*) and ligands (*Ccl3* and *Ccl4*) across microglial clusters. Source data are provided as Supplementary information.
